# Supplementary material
Source: PubMed Central journal article supplement (PMC4695400)

A

## TCGA PRAD Samples Assessment

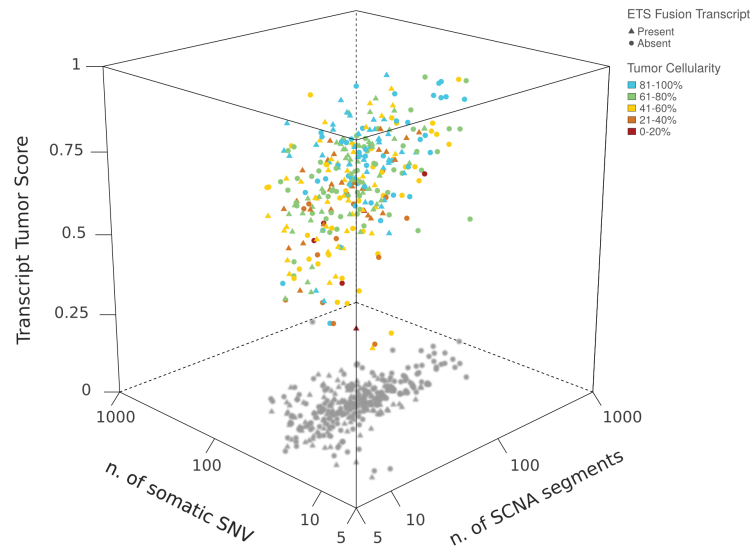

B

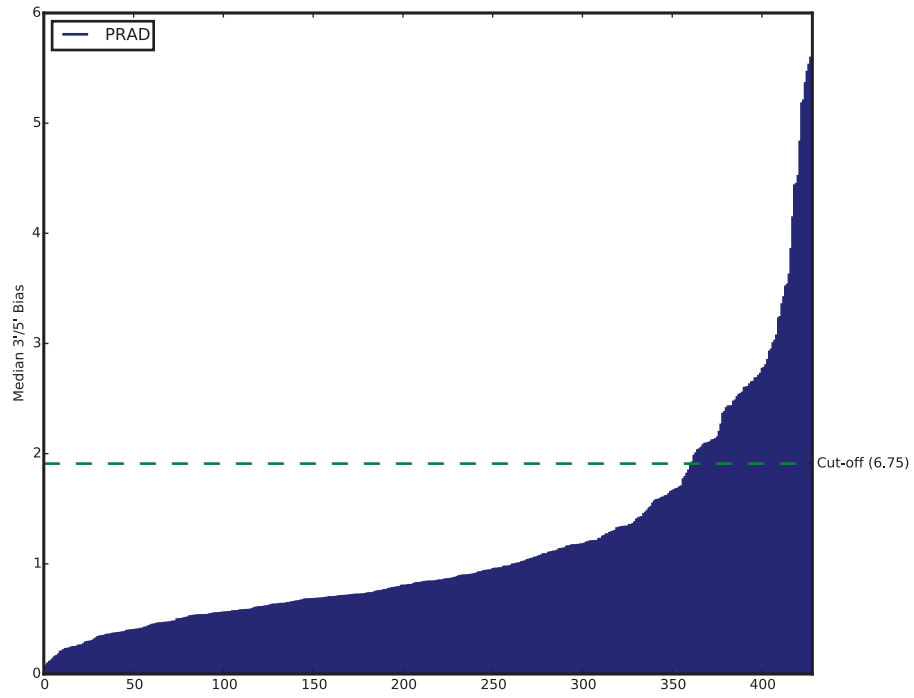

C

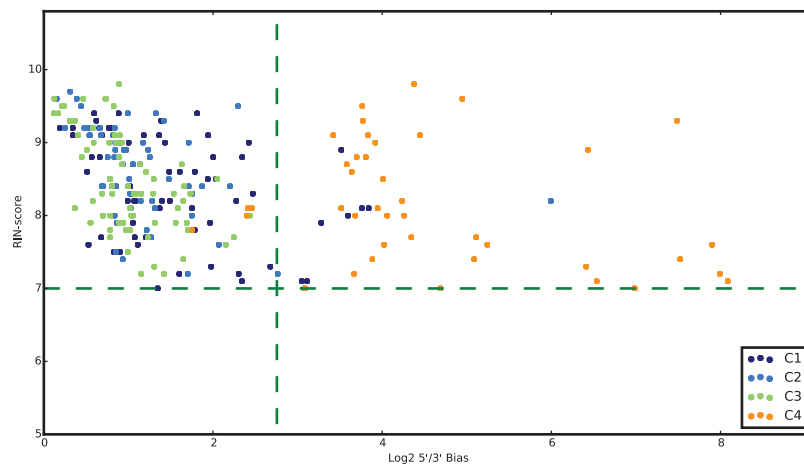

Supplement: NIHMS730293-supplement-1.pdf [file NIHMS730293-supplement-1.pdf]

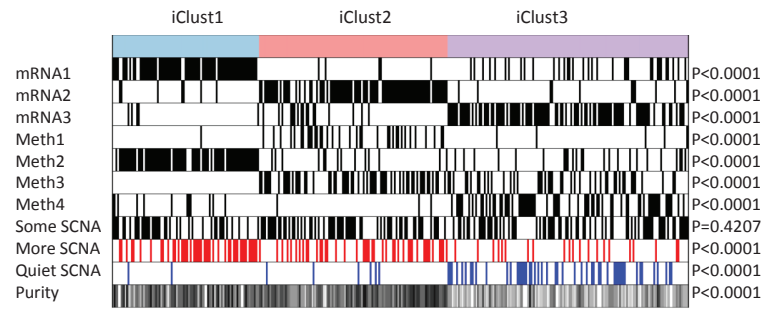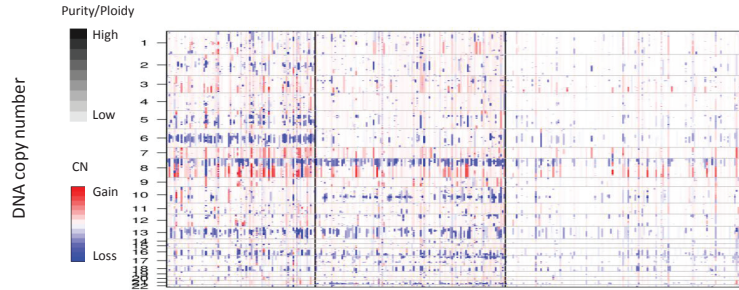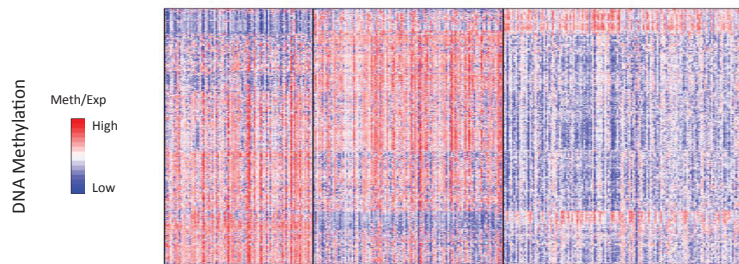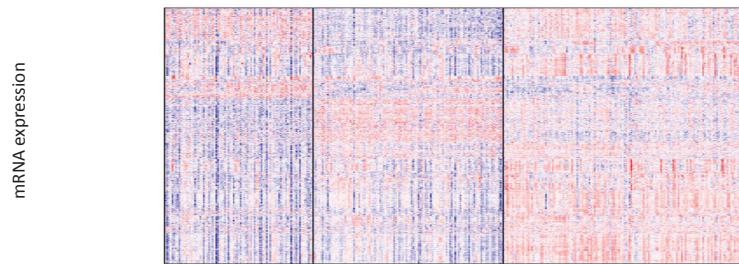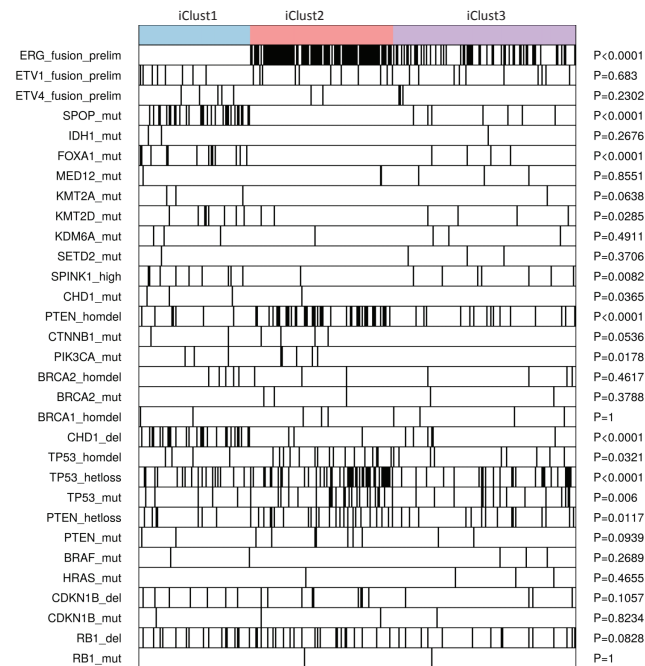

Supplement: NIHMS730293-supplement-2.pdf [file NIHMS730293-supplement-2.pdf]

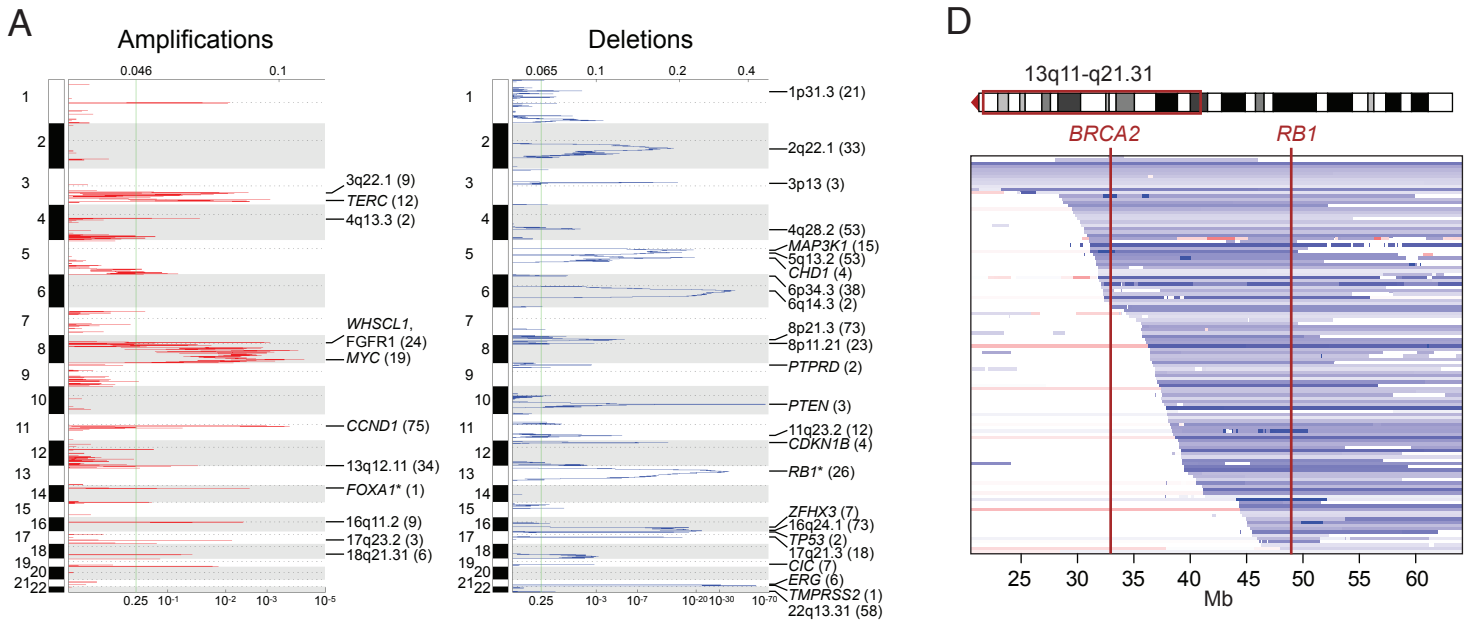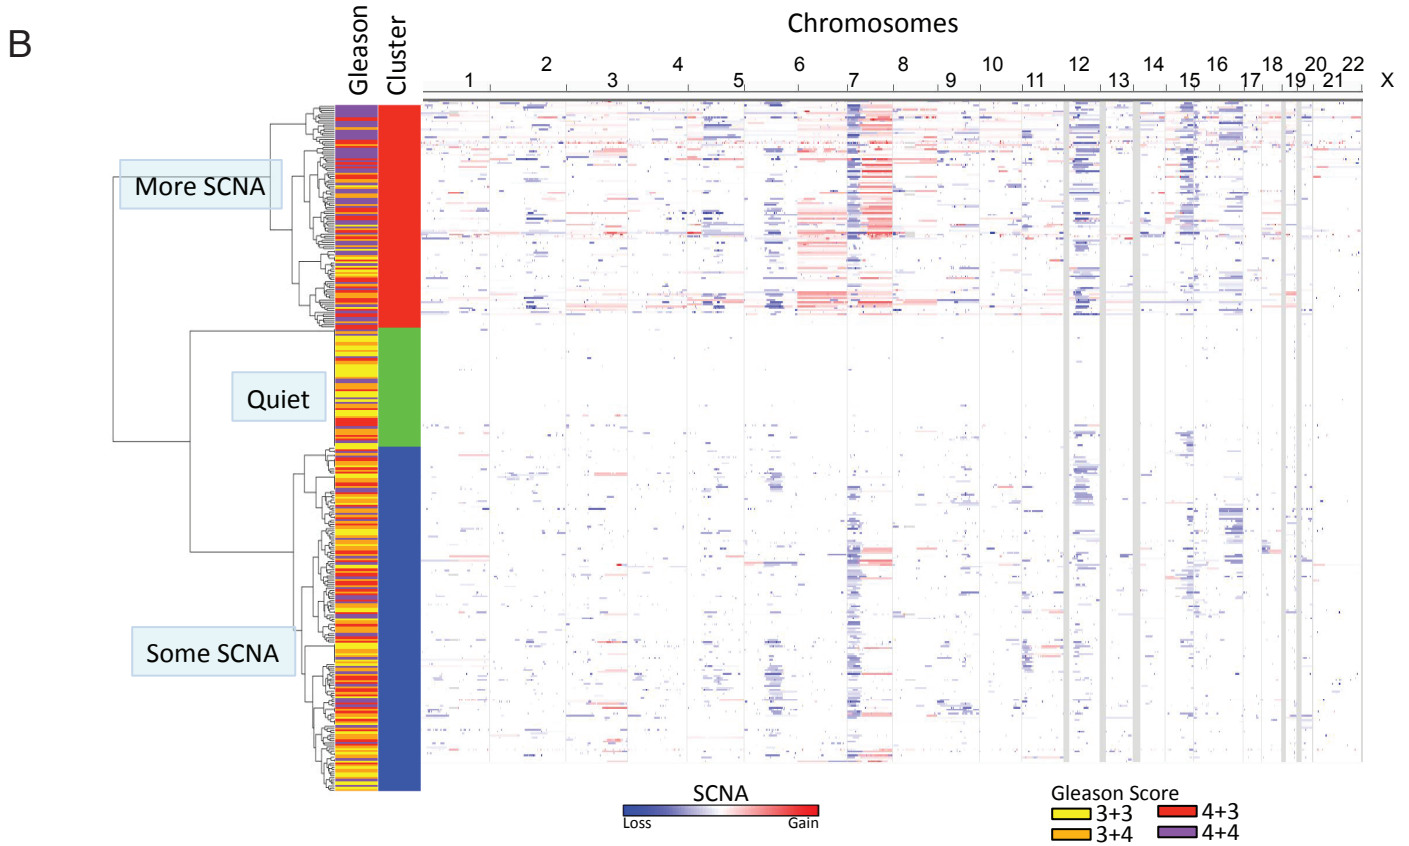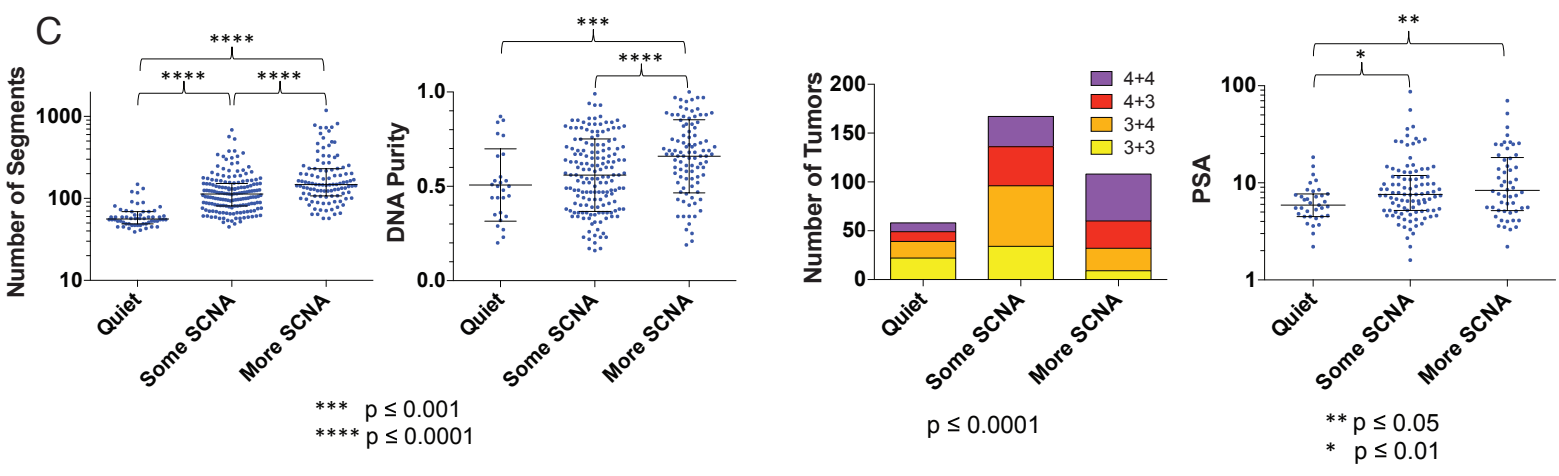

Supplement: NIHMS730293-supplement-3.pdf [file NIHMS730293-supplement-3.pdf]

A

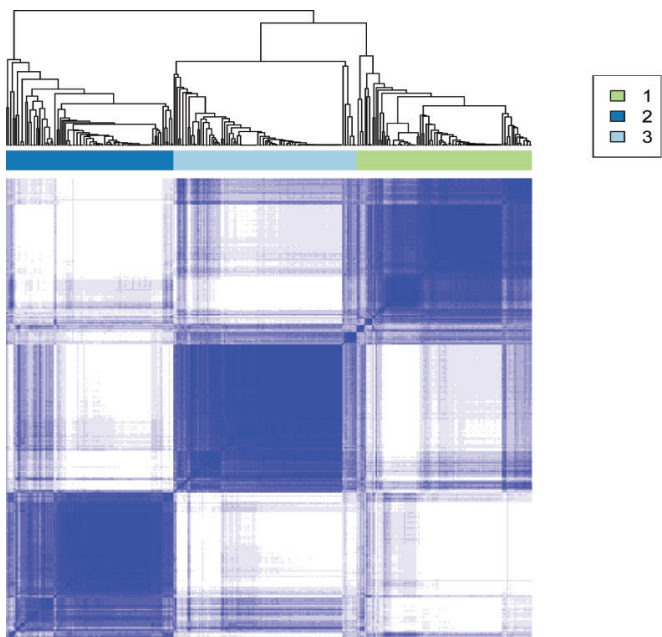

C

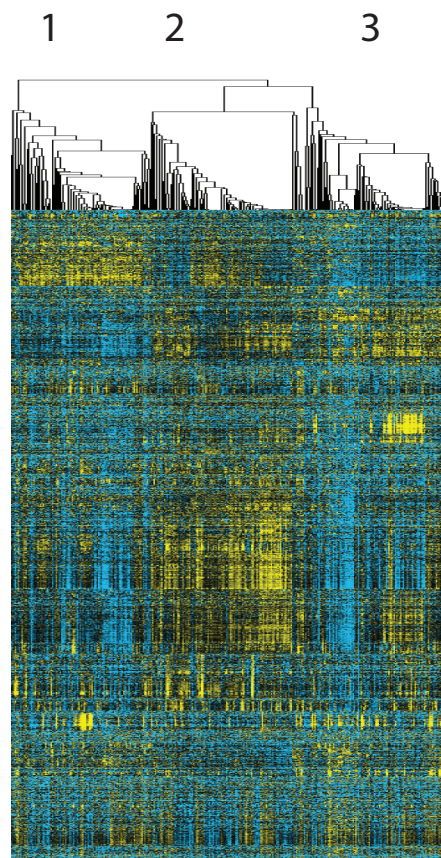

B

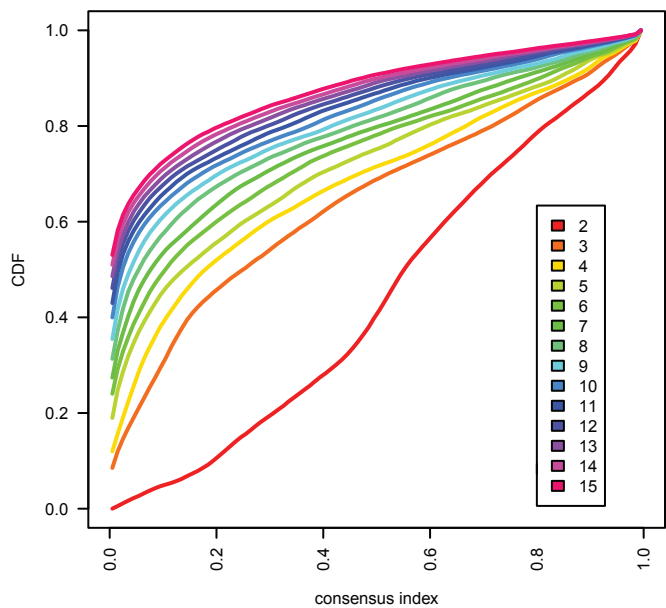

D

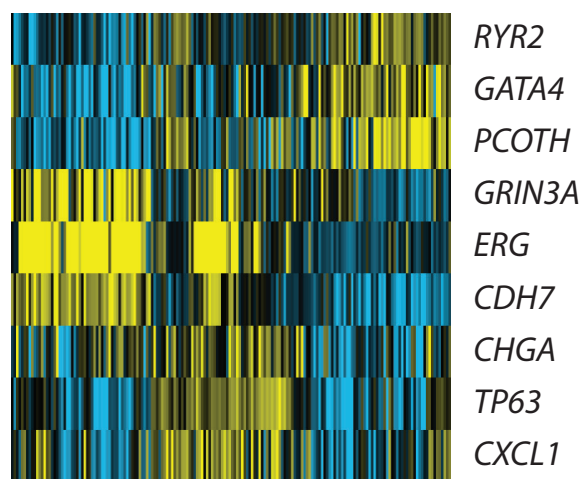

Supplement: NIHMS730293-supplement-4.pdf [file NIHMS730293-supplement-4.pdf]

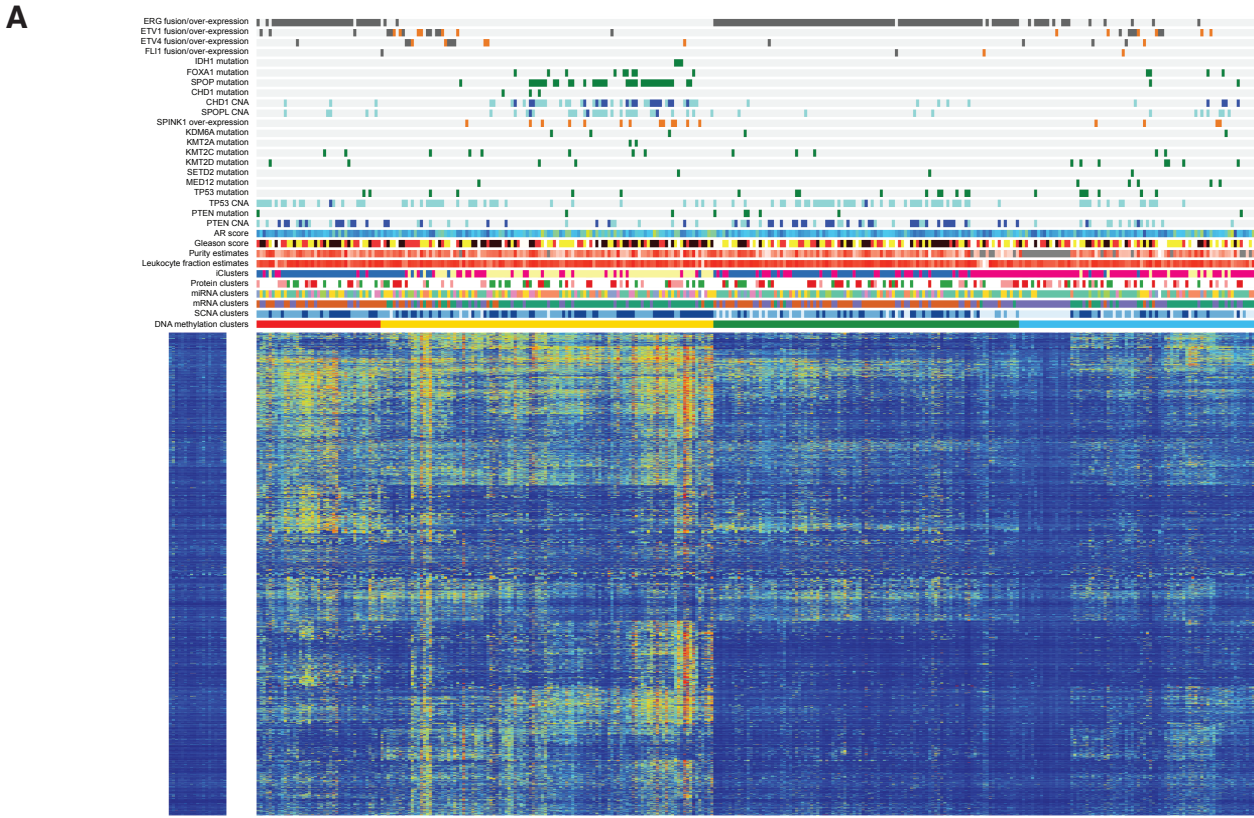

Normals (n=19)

Tumors (n=333)

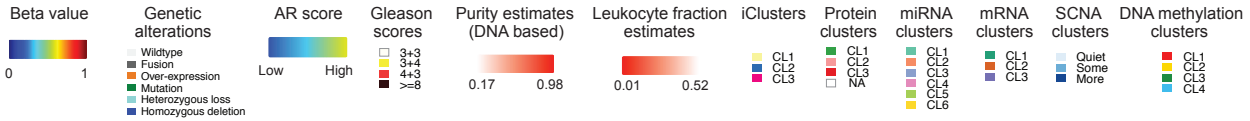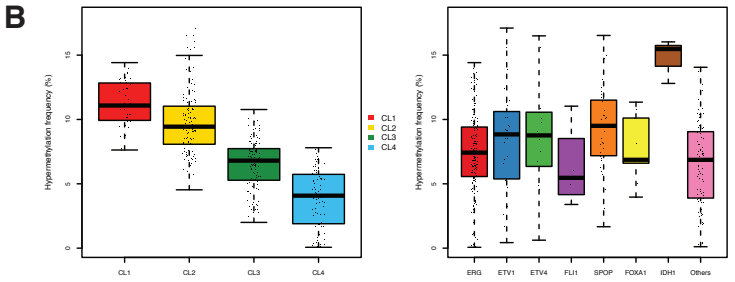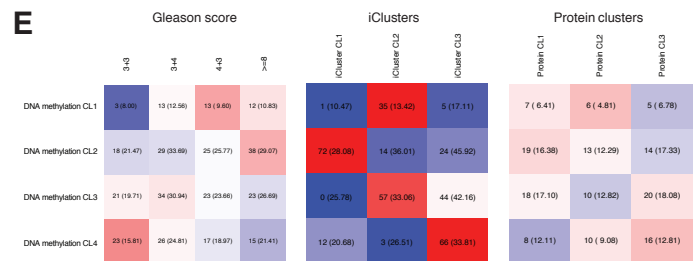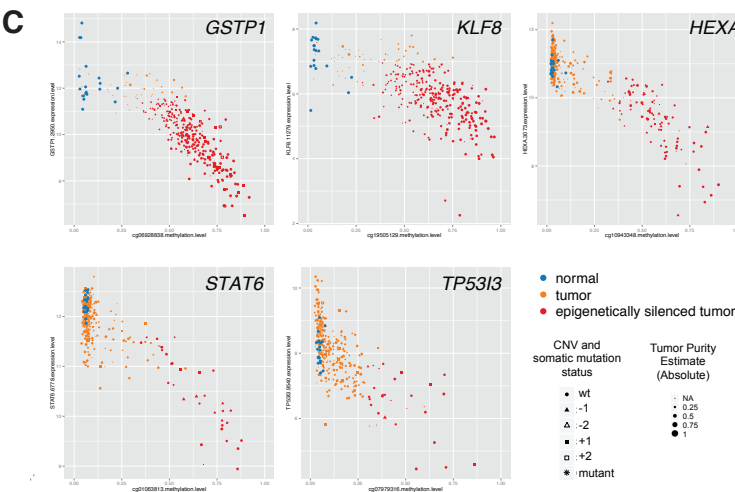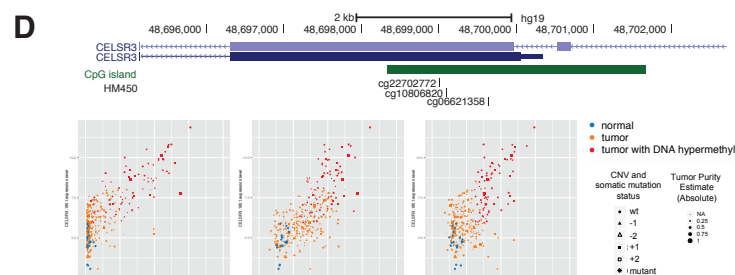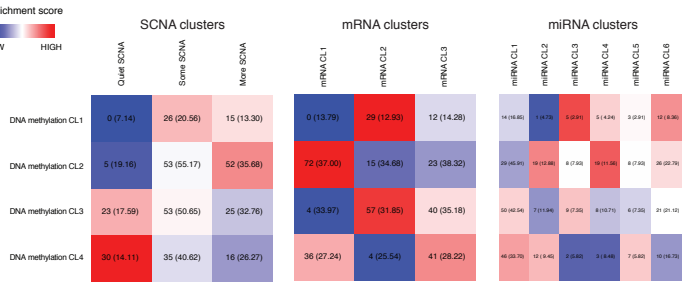

Supplement: NIHMS730293-supplement-5.pdf [file NIHMS730293-supplement-5.pdf]

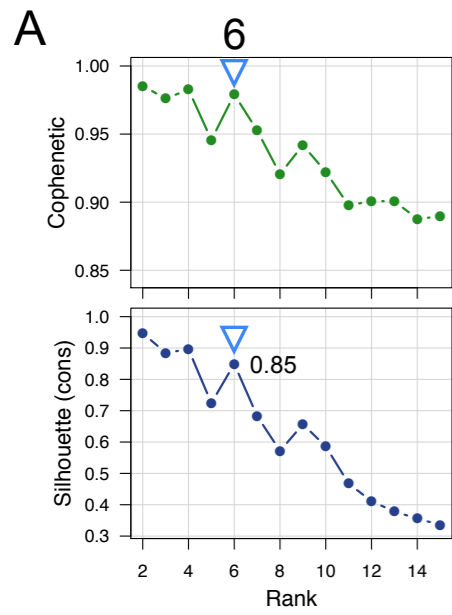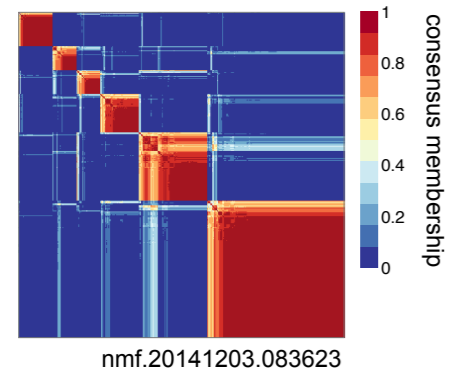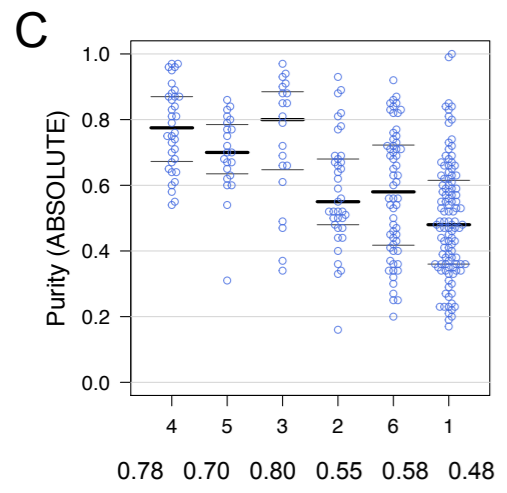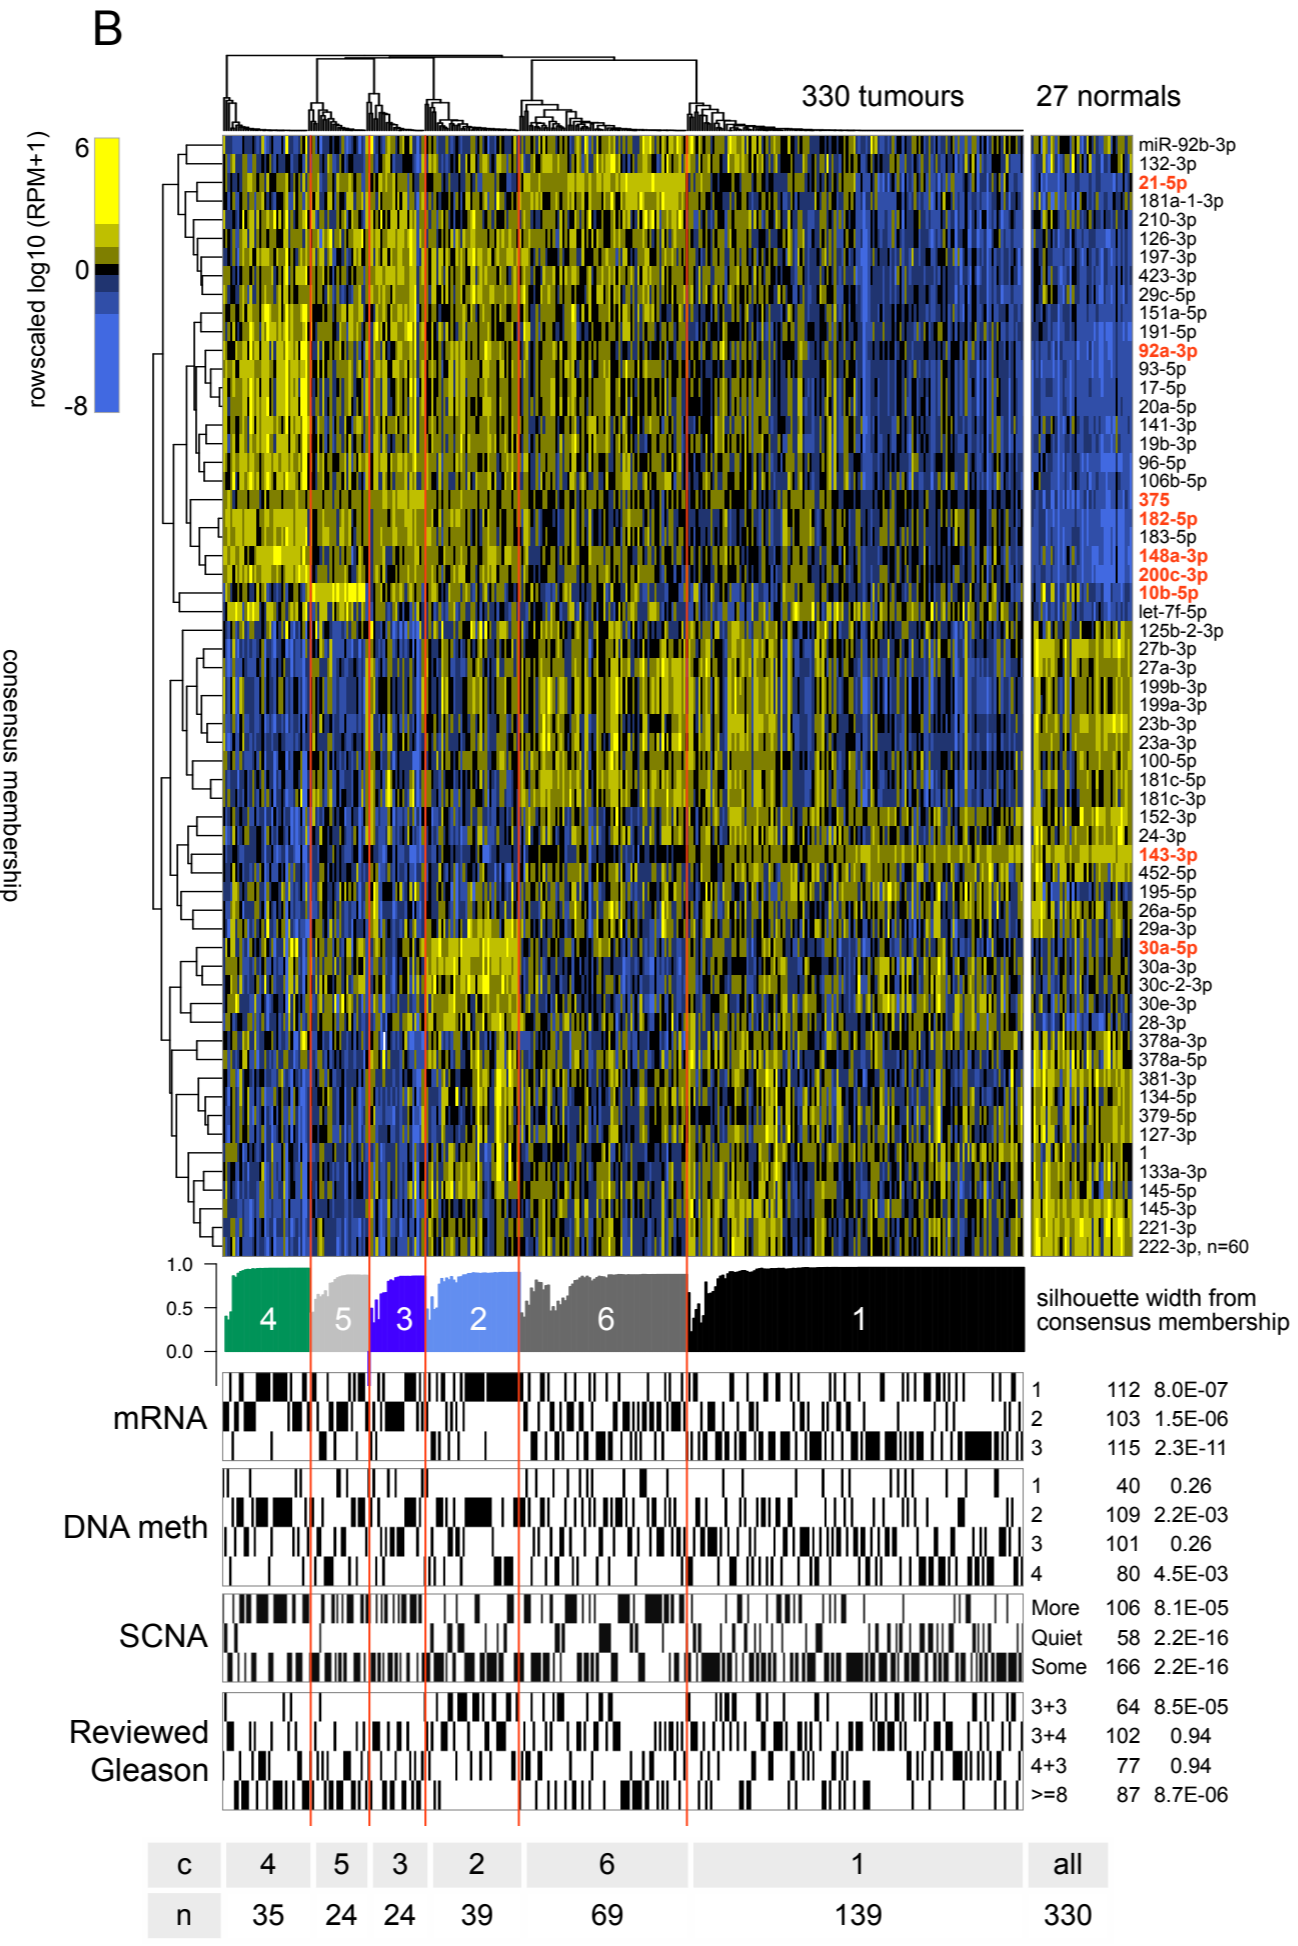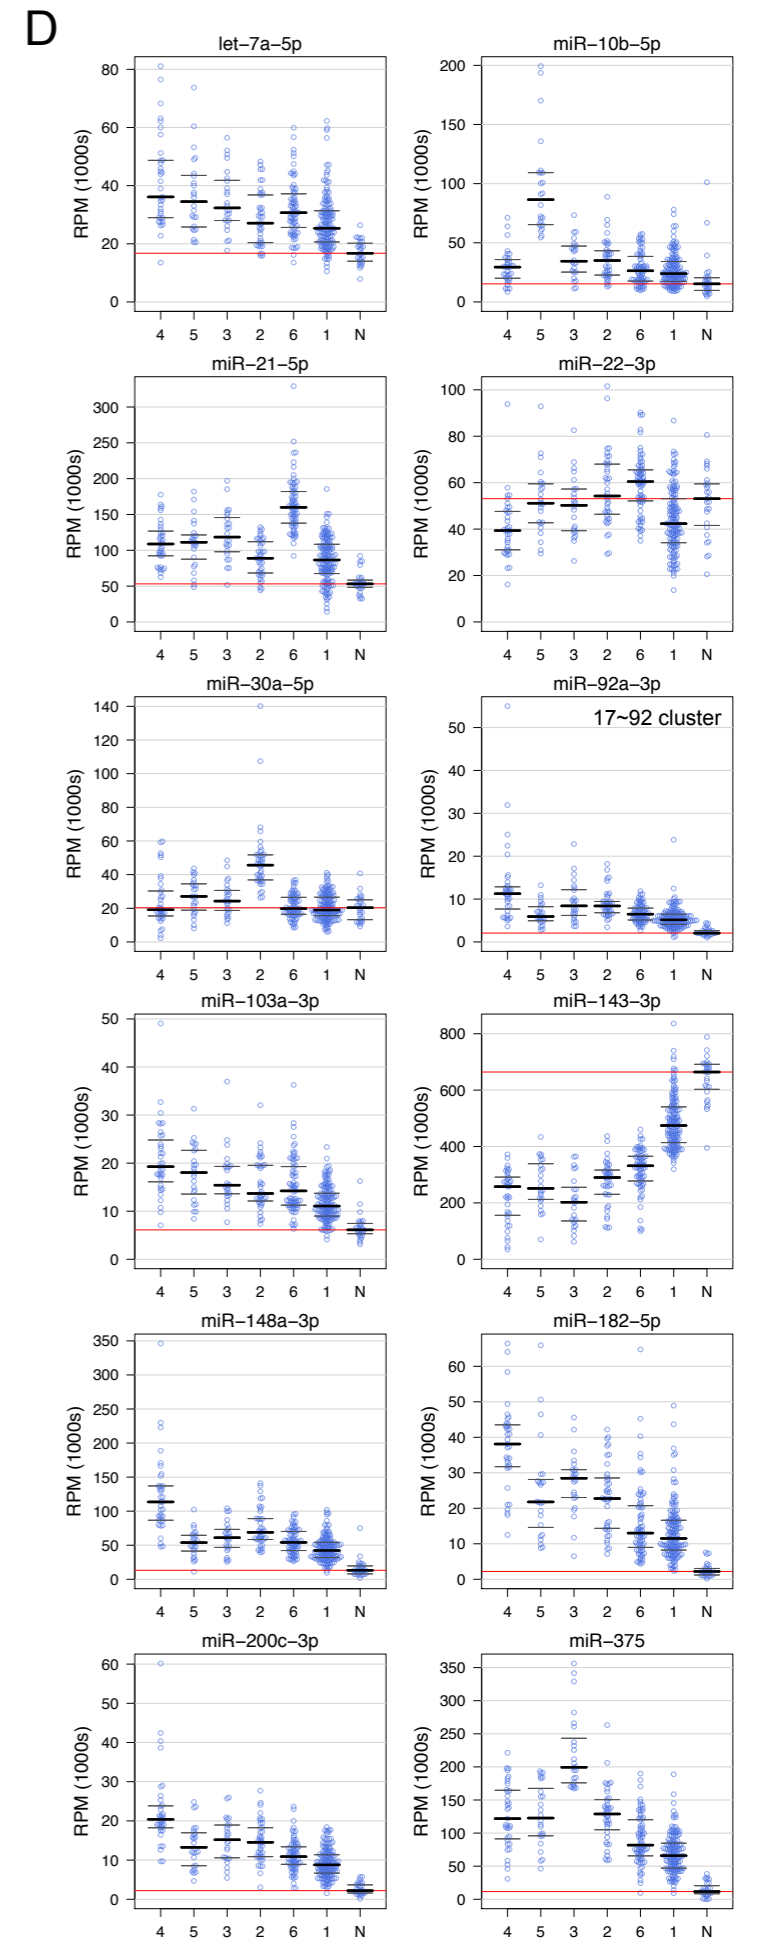

Supplement: NIHMS730293-supplement-6.pdf [file NIHMS730293-supplement-6.pdf]

A

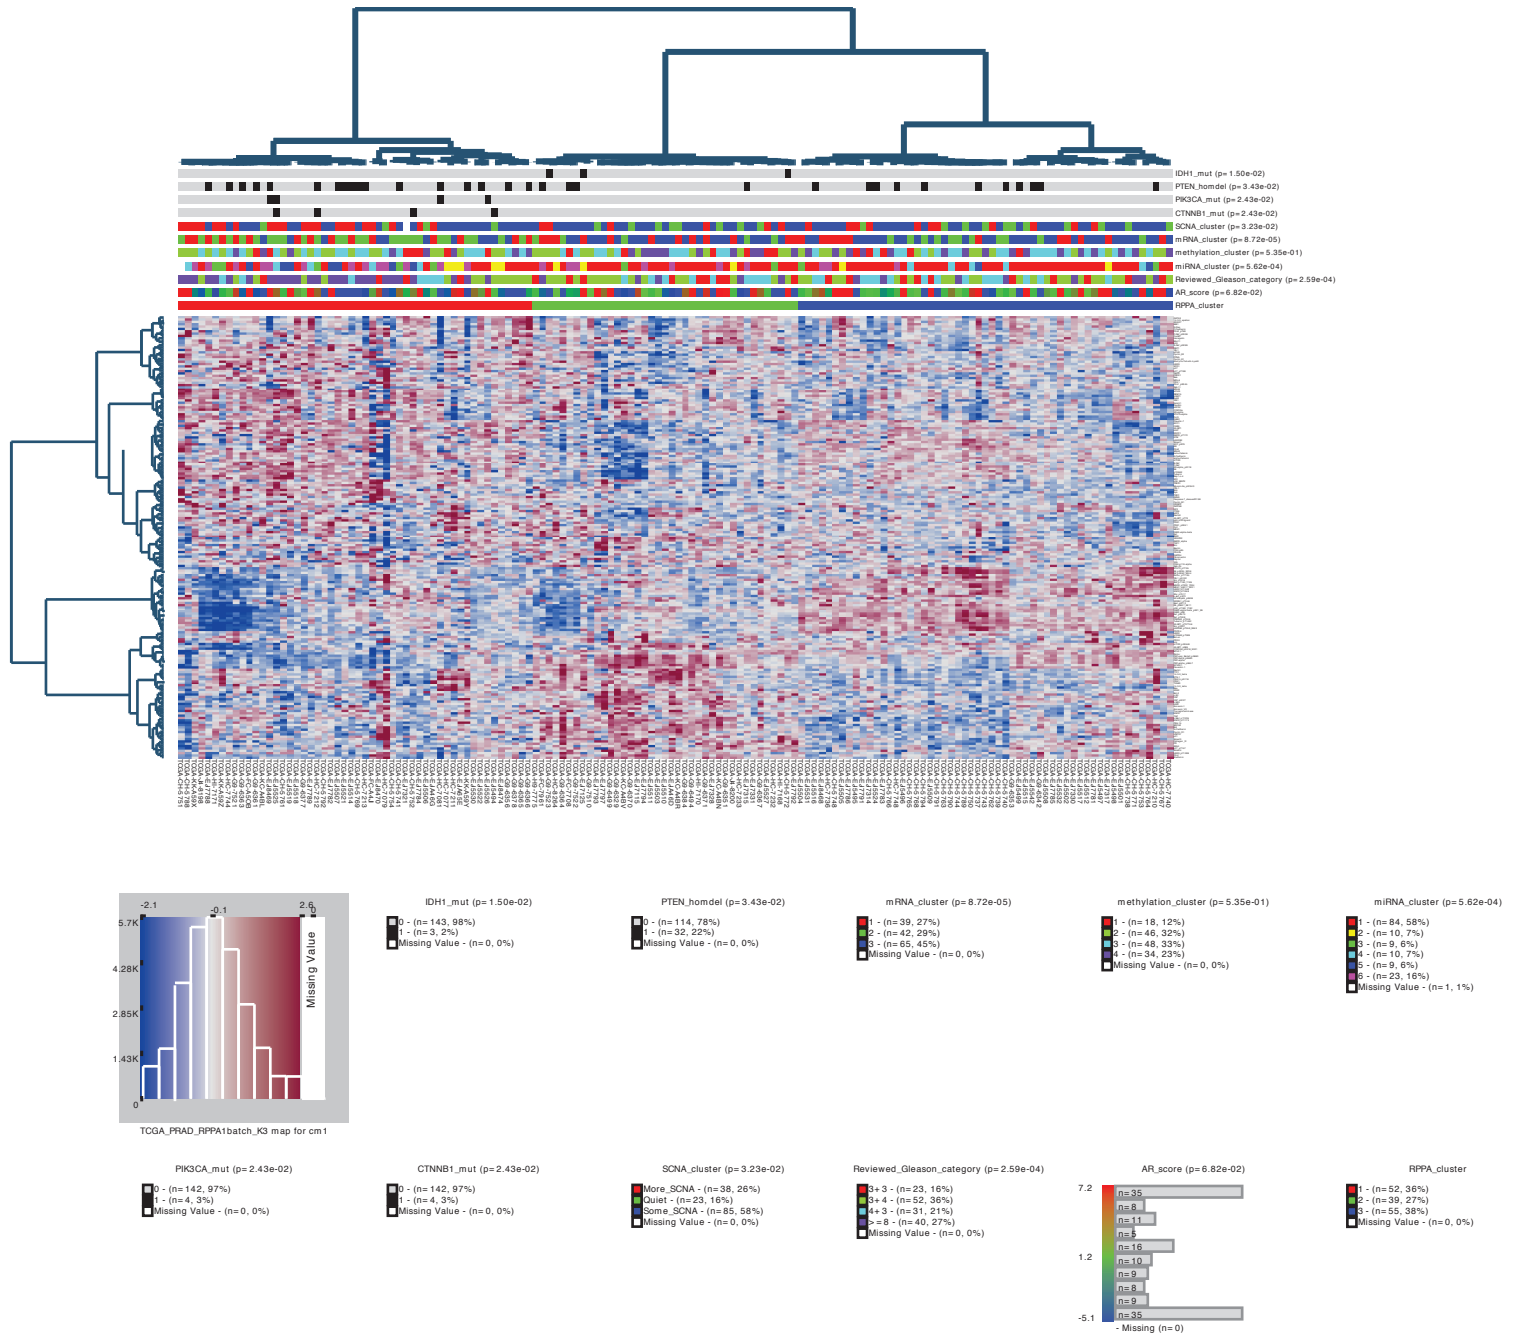

B

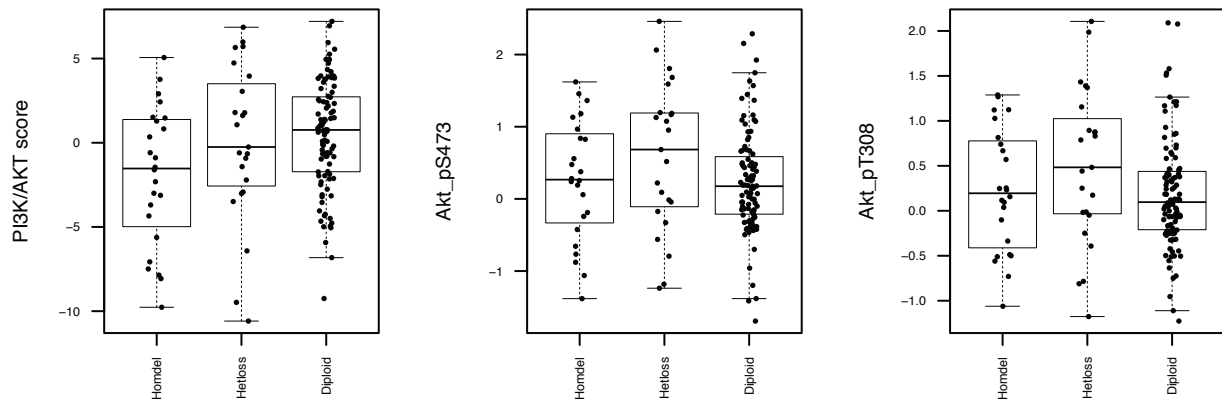

Supplement: NIHMS730293-supplement-7.pdf [file NIHMS730293-supplement-7.pdf]
